# Supplementary material for: Sol–gel synthesis and electrochemical properties of c-axis oriented LiCoO2for lithium-ion batteries
Source: Royal Society of Chemistry journal article supplement (doi:10.1039/c5ra06571b), 2015-01-01
Supplement: c5ra06571b1.pdf [file c5ra06571b1.pdf]

Electronic Supplementary Material (ESI) for RSC Advances.  
This journal is © The Royal Society of Chemistry 2015

## SUPPORTING INFORMATION

### **Sol-gel Synthesis and Electrochemical Properties of c-Axis Oriented LiCoO<sub>2</sub> for Lithium-ion Batteries**

*Sen Gao,<sup>a</sup> Wei Wei,<sup>a</sup> Maixia Ma,<sup>a</sup> Juanjuan Qi,<sup>a</sup> Jie Yang,<sup>a</sup> Shengqi Chu,<sup>b</sup> Jing*

*Zhang,<sup>b</sup> and Lin Guo<sup>\*a</sup>*

<sup>a</sup> School of Chemistry and Environment, Beihang University, Beijing 100191, P. R.

China. E-mail: guolin@buaa.edu.cn

<sup>b</sup> Institute of High Energy Physics, the Chinese Academy of Sciences, Beijing,

100049, P. R. China.

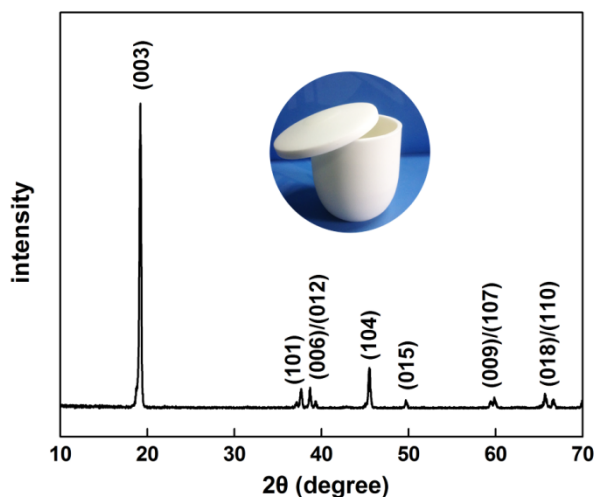

**Figure S1.** XRD pattern of the LiCoO<sub>2</sub> with medium degree of c-axis orientation

As shown in Fig. S1, when part of the crucible, for example, half the mouth was covered, LiCoO<sub>2</sub> with  $I_{003}/I_{104}$  value 7.5 was obtained, and denoted as m-LCO (LiCoO<sub>2</sub> with medium degree of c-axis orientation). It can be found that the  $I_{003}/I_{104}$  increases nearly linearly with area covered during calcination, and the degree of c-axis orientation could be adjusted between l-LCO and h-LCO by this simple method.

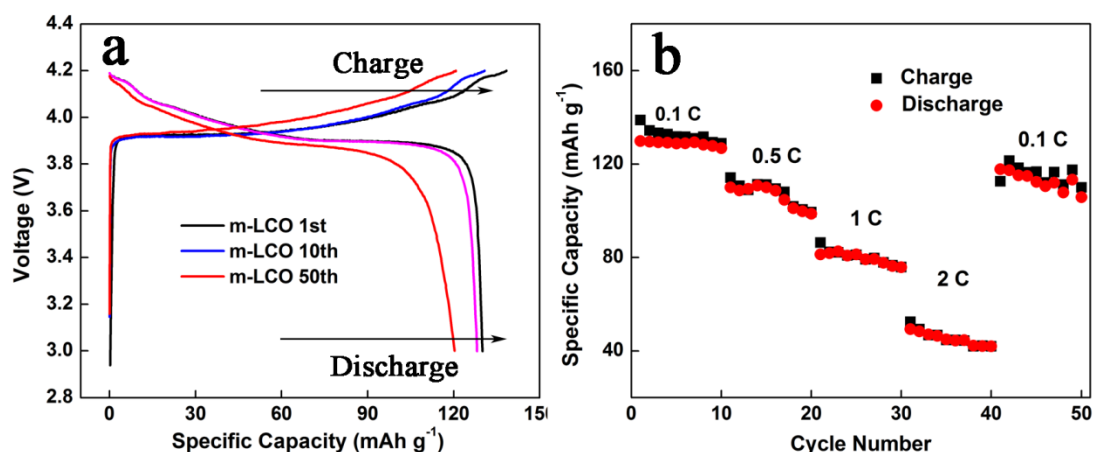

**Figure S2.** Electrochemical performance of m-LCO: (a) charge/discharge curves at the 1st, 10th and 50th cycles at 0.1 C and (b) rate capacities for m-LCO.

Fig. S2a shows typical charge/discharge curves of m-LCO at the 1st, 10th and 50th cycles, measured at a current rate of 0.1 C in the range of 3.0-4.2 V. The initial

discharge capacity of m-LCO at 0.1 C is 130.2 mA h·g<sup>-1</sup>. After 50 cycles, the discharge capacity remains 120.3 mA h·g<sup>-1</sup>, corresponding to a capacity retention of 92.4%. Fig. S2b illustrates the discharge curves at different rates. The m-LCO delivers a rate capacity of 49.2 mA h·g<sup>-1</sup> at 2C, which means 37.9% of the capacity at 0.1C is retained.

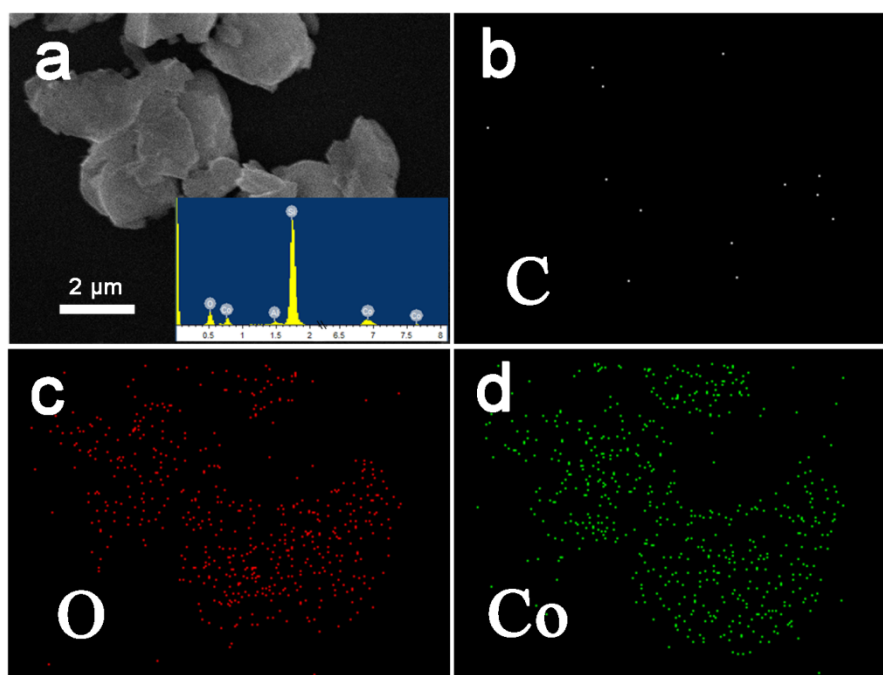

**Figure S3.** (a) SEM image of l-LCO (the inset is the EDS spectrum for l-LCO); EDS mapping for (b) C, (c) O and (d) Co elements.

EDS spectrum for l-LCO is shown in Fig. S3a and no signal of Carbon is detected. The EDS elemental mappings (Fig. S3b-d) of the l-LCO show a uniform distribution of O and Co, which confirms the existence and uniform distribution of O and Co in l-LCO. But the carbon content in l-LCO is negligible, which is in good agreement with the EDS spectrum.

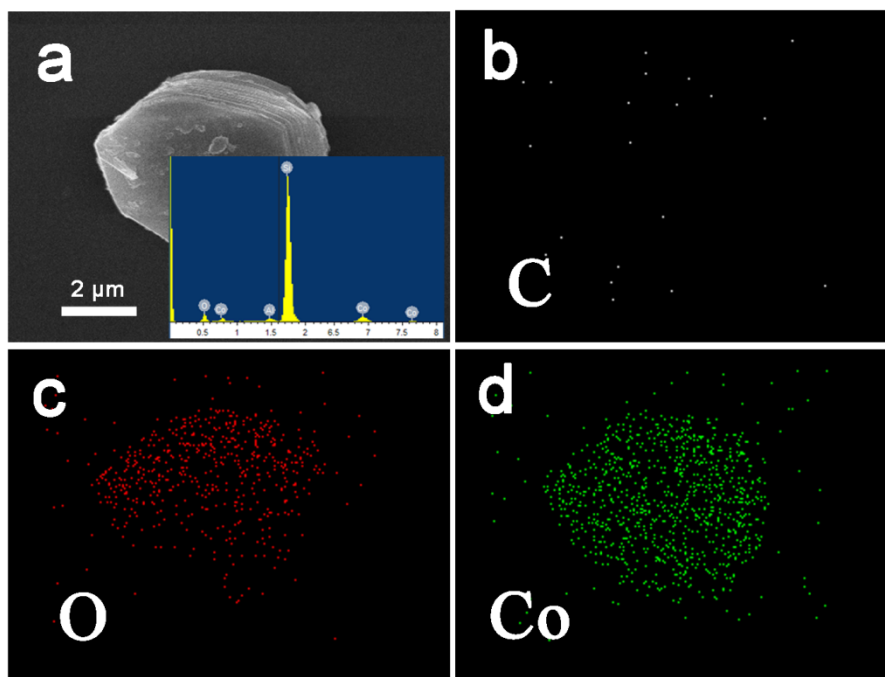

**Figure S4.** (a) SEM image of h-LCO (the inset is the EDS spectrum for h-LCO); EDS mapping for (b) C, (c) O and (d) Co elements.

EDS spectrum for h-LCO is shown in Fig. S4a and no signal of Carbon is collected. The EDS elemental mappings (Fig. S4b-d) of the l-LCO show a uniform distribution of O and Co. Also, the carbon content in h-LCO is negligible, which is in accordance with the EDS spectrum.
